# Supplementary material for: Partial depletion of CD206-positive M2-like macrophages induces proliferation of beige progenitors and enhances browning after cold stimulation
Source: PubMed Central journal article supplement (PMC6167387; doi:10.1038/s41598-018-32803-6), 2018-10-01
Supplement: 41598_2018_32803_MOESM1_ESM.pdf [file 41598_2018_32803_MOESM1_ESM.pdf]

# **Partial depletion of CD206-positive M2-like macrophages induces proliferation of beige progenitors and enhances browning after cold stimulation**

## **Authors:**

Yoshiko Igarashi<sup>1</sup>, Allah Nawaz<sup>1,5,6</sup>, Tomonobu Kado<sup>1</sup>, Muhammad Bilal<sup>1</sup>, Takahide Kuwano<sup>1</sup>, Seiji Yamamoto<sup>2</sup>, Masakiyo Sasahara<sup>2</sup>, Xu Jiuxiang<sup>3</sup>, Akiko Inujima<sup>3</sup>, Keiichi Koizumi<sup>3</sup>, Johji Imura<sup>4</sup>, Naotoshi Shibahara<sup>3</sup>, Isao Usui<sup>1,7</sup>, Shiho Fujisaka<sup>1</sup>, Kazuyuki Tobe<sup>1</sup>

## Supplementary Figures

### Figure S1. Creation of CD206DTR transgenic (Tg) mice

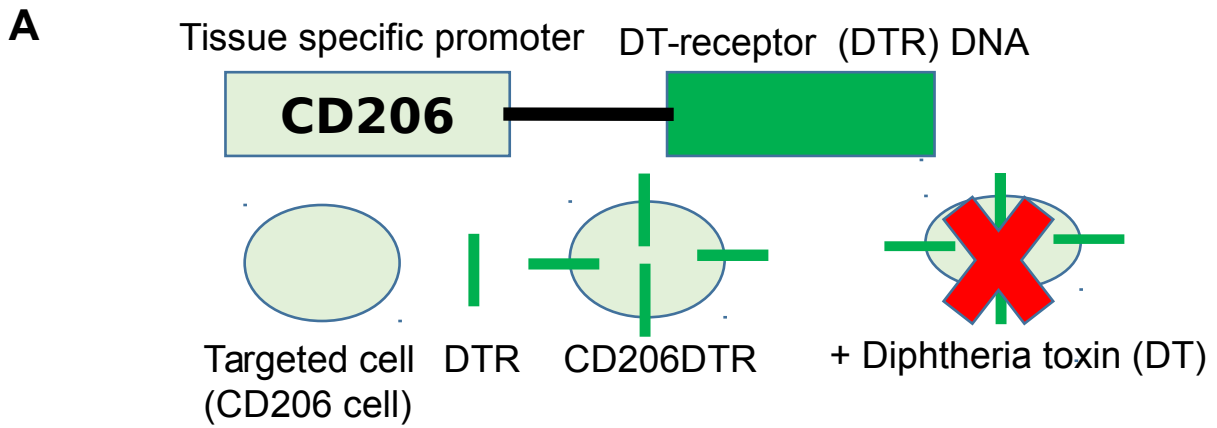

**B**

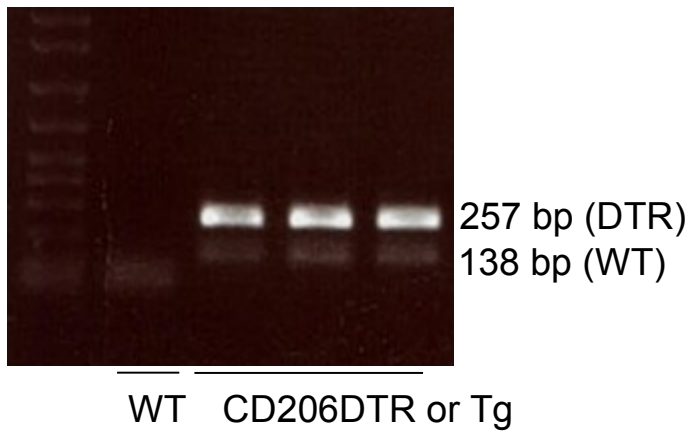

### **Figure S1. Creation of CD206DTR transgenic (Tg) mice**

**(A).** Creation of CD206DTR transgenic (Tg) mice based on the transgenic expression of diphtheria toxin receptor (DTR) under the control of the CD206-positive promoter to specifically ablate CD206<sup>+</sup> macrophages. Administration of diphtheria toxin (DT) successfully but partially depleted CD206<sup>+</sup> macrophages in Tg mice without affecting the overall health of the mice. **(B).** PCR-genotyping analysis showing 257-bp specific sequence of DTR in CD206DTR or Tg mice and 137-bp in WT control mice.

**Figure S2. Effect of cold stimulation on BAT and ingWAT**

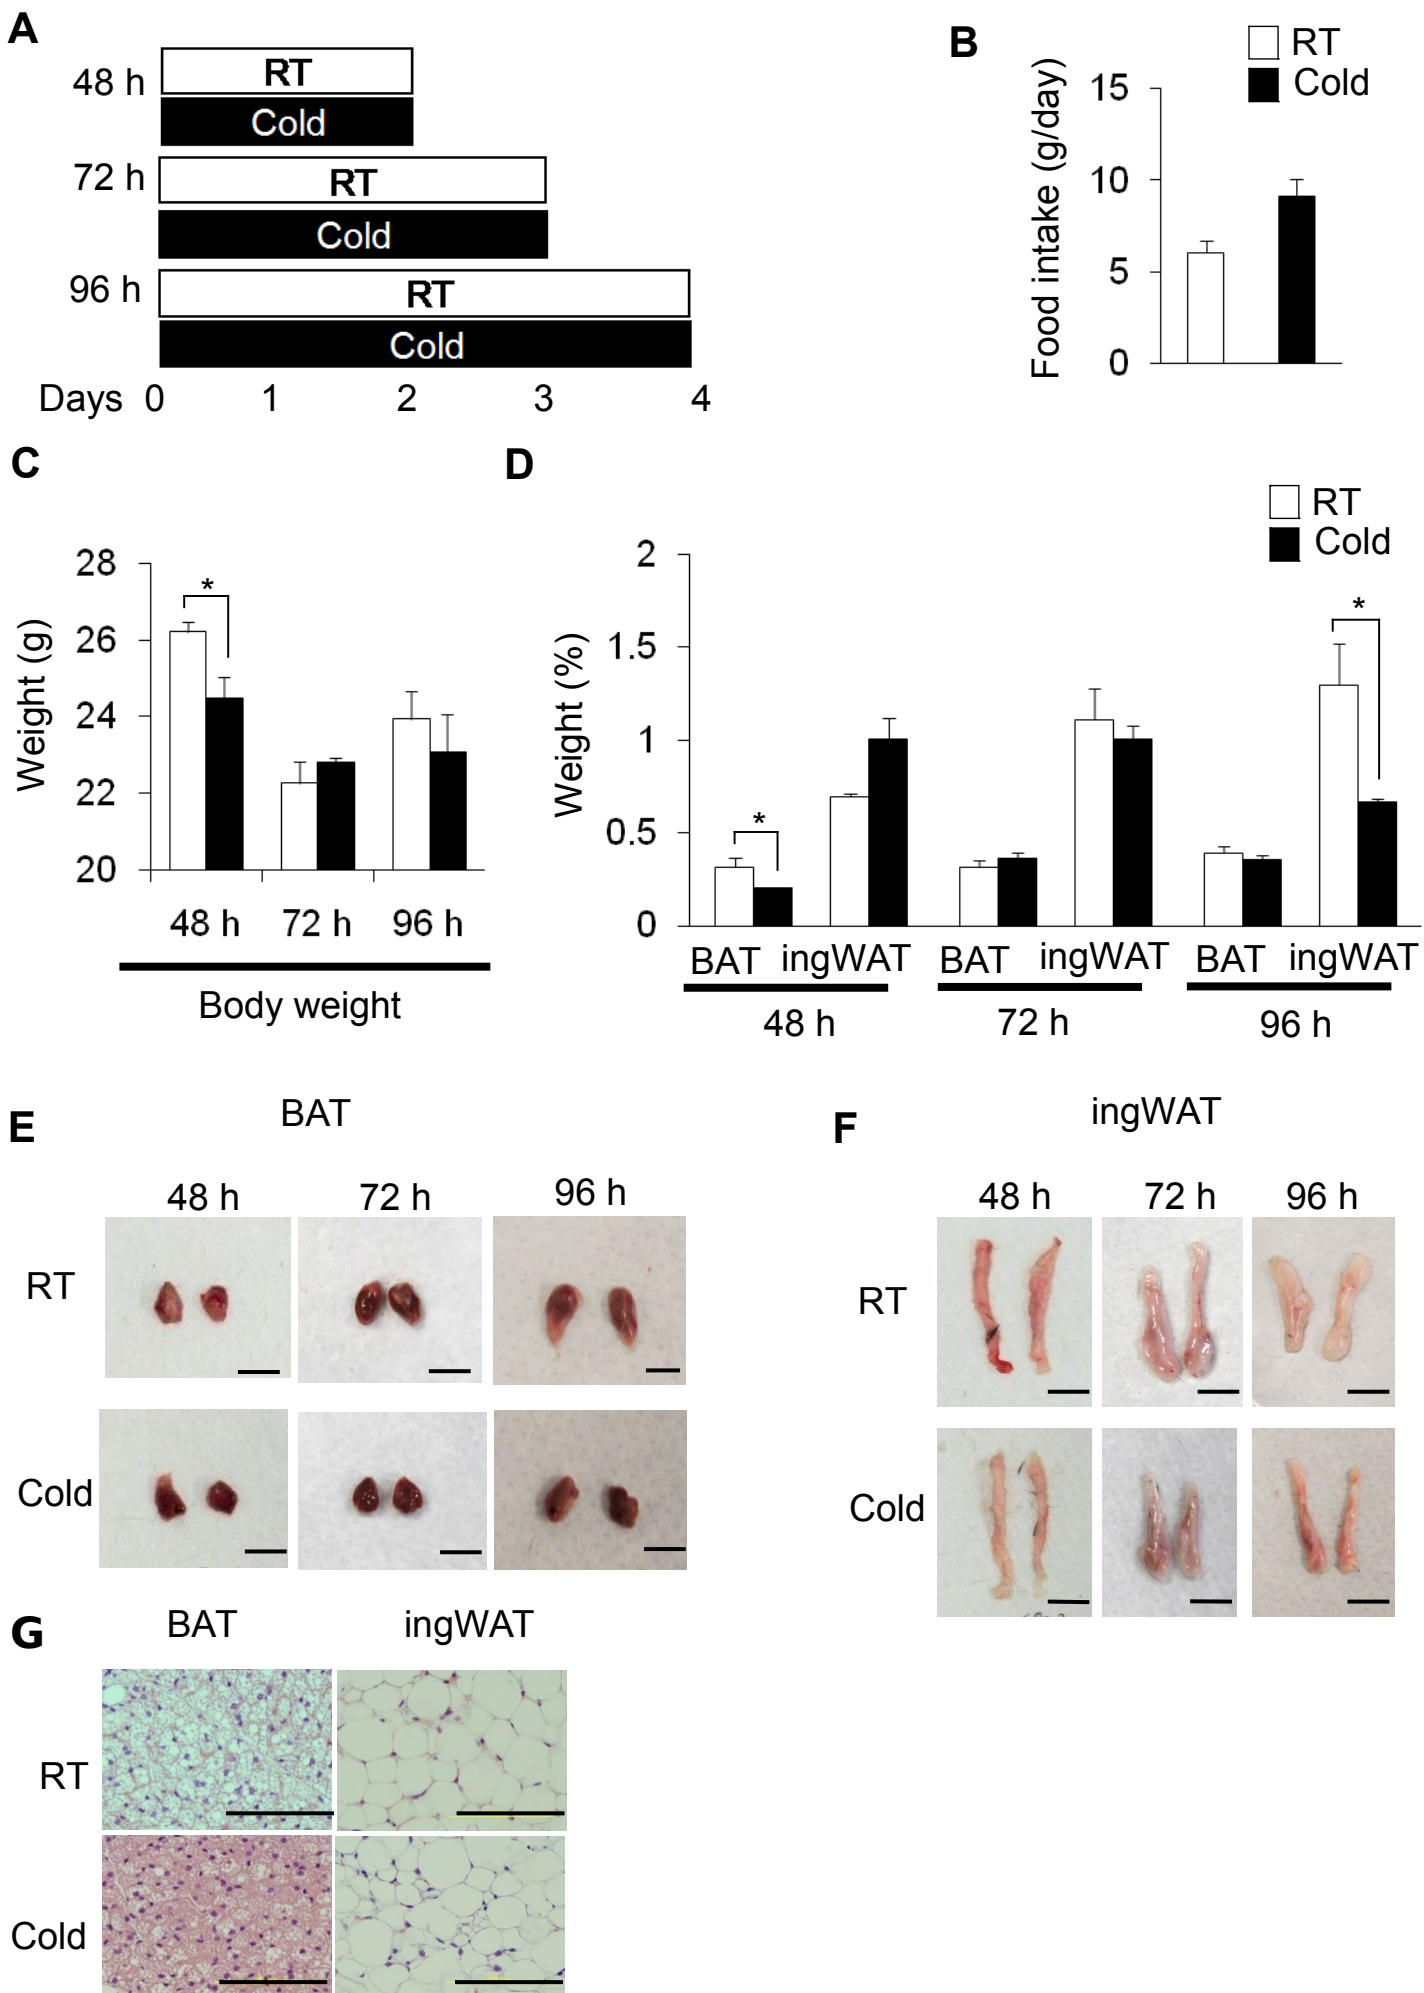

## **Figure S2. Effect of cold stimulation on BAT and ingWAT**

**(A).** Schematic representation of the experimental time schedule of the cold stimulation. Six groups of WT mice ( $n = 3$  mice per group) were kept under the cold stimulation ( $6^{\circ}\text{C}$ ) and room temperature (RT) for 48 h, 72 h and 96 h.

**(B).** Changes in food intake between the mice maintained at RT and Cold.

**(C,D).** Changes in body weight (g), adipose tissue weight (BAT and ingWAT) of RT (white) and cold (black) mice as percentage of body weight (48 h, 72 h and 96 h) ( $n = 3$  mice per group). The data are shown as the means  $\pm$  SEM.  $*P < 0.05$ .

**(E,F).** Representative images of BAT and ingWAT of WT mice (scale bar, 0.5cm).

**(G).** Representative images of paraffin sections of BAT and ingWAT of cold stimulated (96 h) WT mice stained with hemotxylin and eosin (H&E). These pictures were taken by using Olympus BX61/DP70, using 40x magnification. Scale bar, 100  $\mu\text{m}$ . ( $n = 3$  mice per group). The data are shown as the means  $\pm$  SEM.  $*p < 0.05$ ,  $**p < 0.01$ , compared with littermates, as determined using Student's t-test.

**Figure S3. Immunohistochemical and gene expression analysis of *UCP1* and other browning genes after cold exposure**

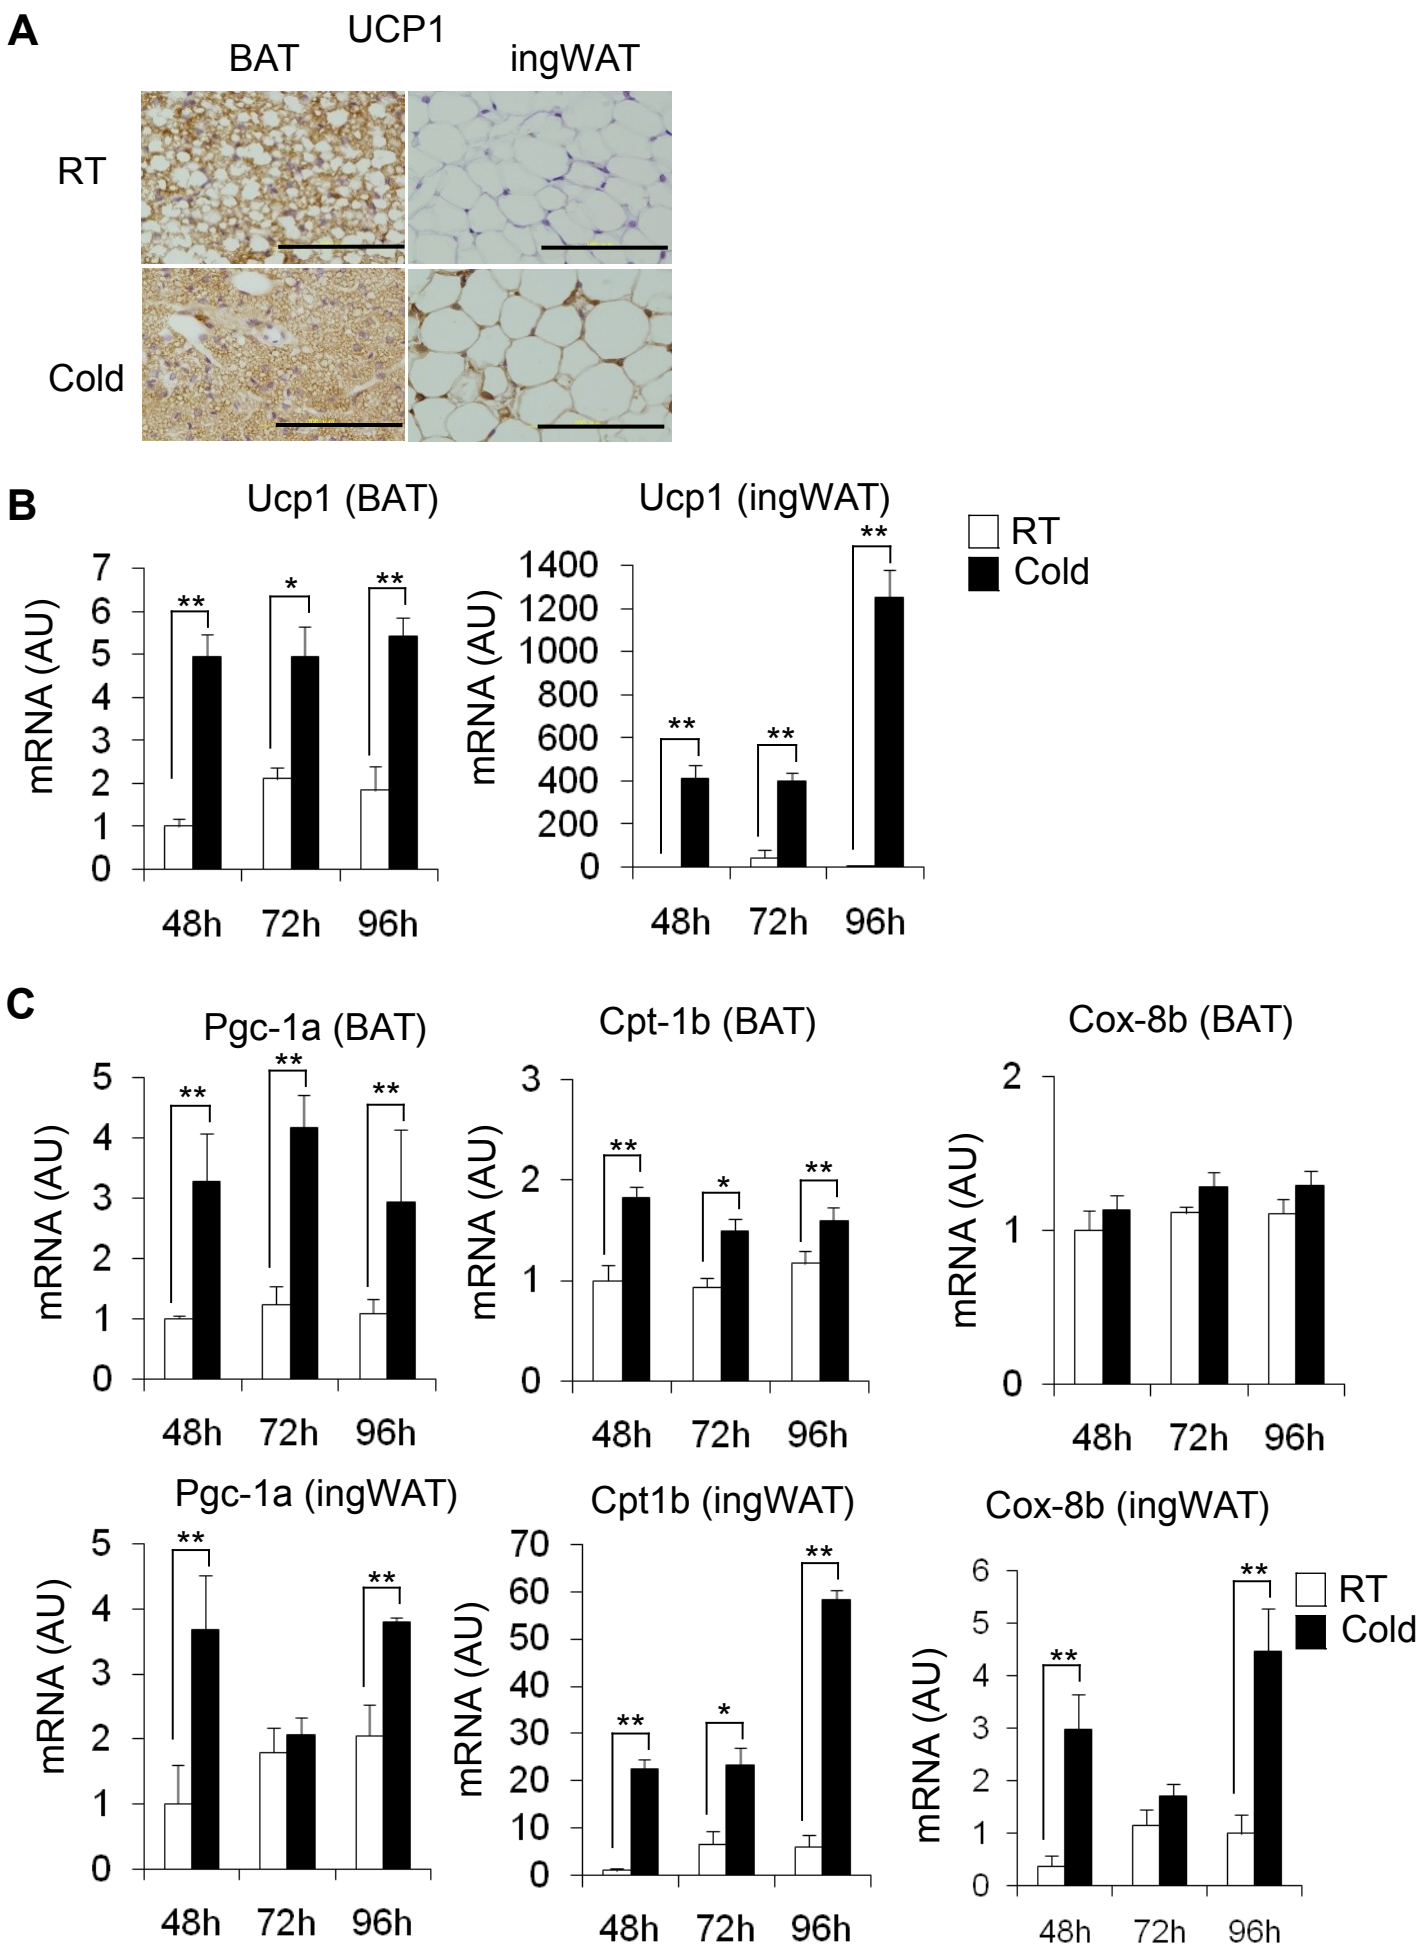

**Figure S3. Immunohistochemical and gene expression analysis of *UCP1* and other browning genes after cold exposure**

**(A).** Representative sections of immunostaining of BAT and ingWAT from cold stimulated WT mice compared with control group mice maintained at RT for same duration were stained with anti-UCP1 antibody. Scale bar, 100  $\mu\text{m}$ . **(B,C).** mRNA expression of *Ucp1* and other browning marker genes in the BAT and ingWAT of WT mice maintained at cold and RT (n = 3 mice per group). The data are shown as the means  $\pm$  SEM. \* $p < 0.05$ , \*\* $p < 0.01$ , compared with littermates, as determined using Student's t-test.

**Figure S4. Schematic diagram for DT administration, gene expression analysis and flow cytometry full gating strategy**

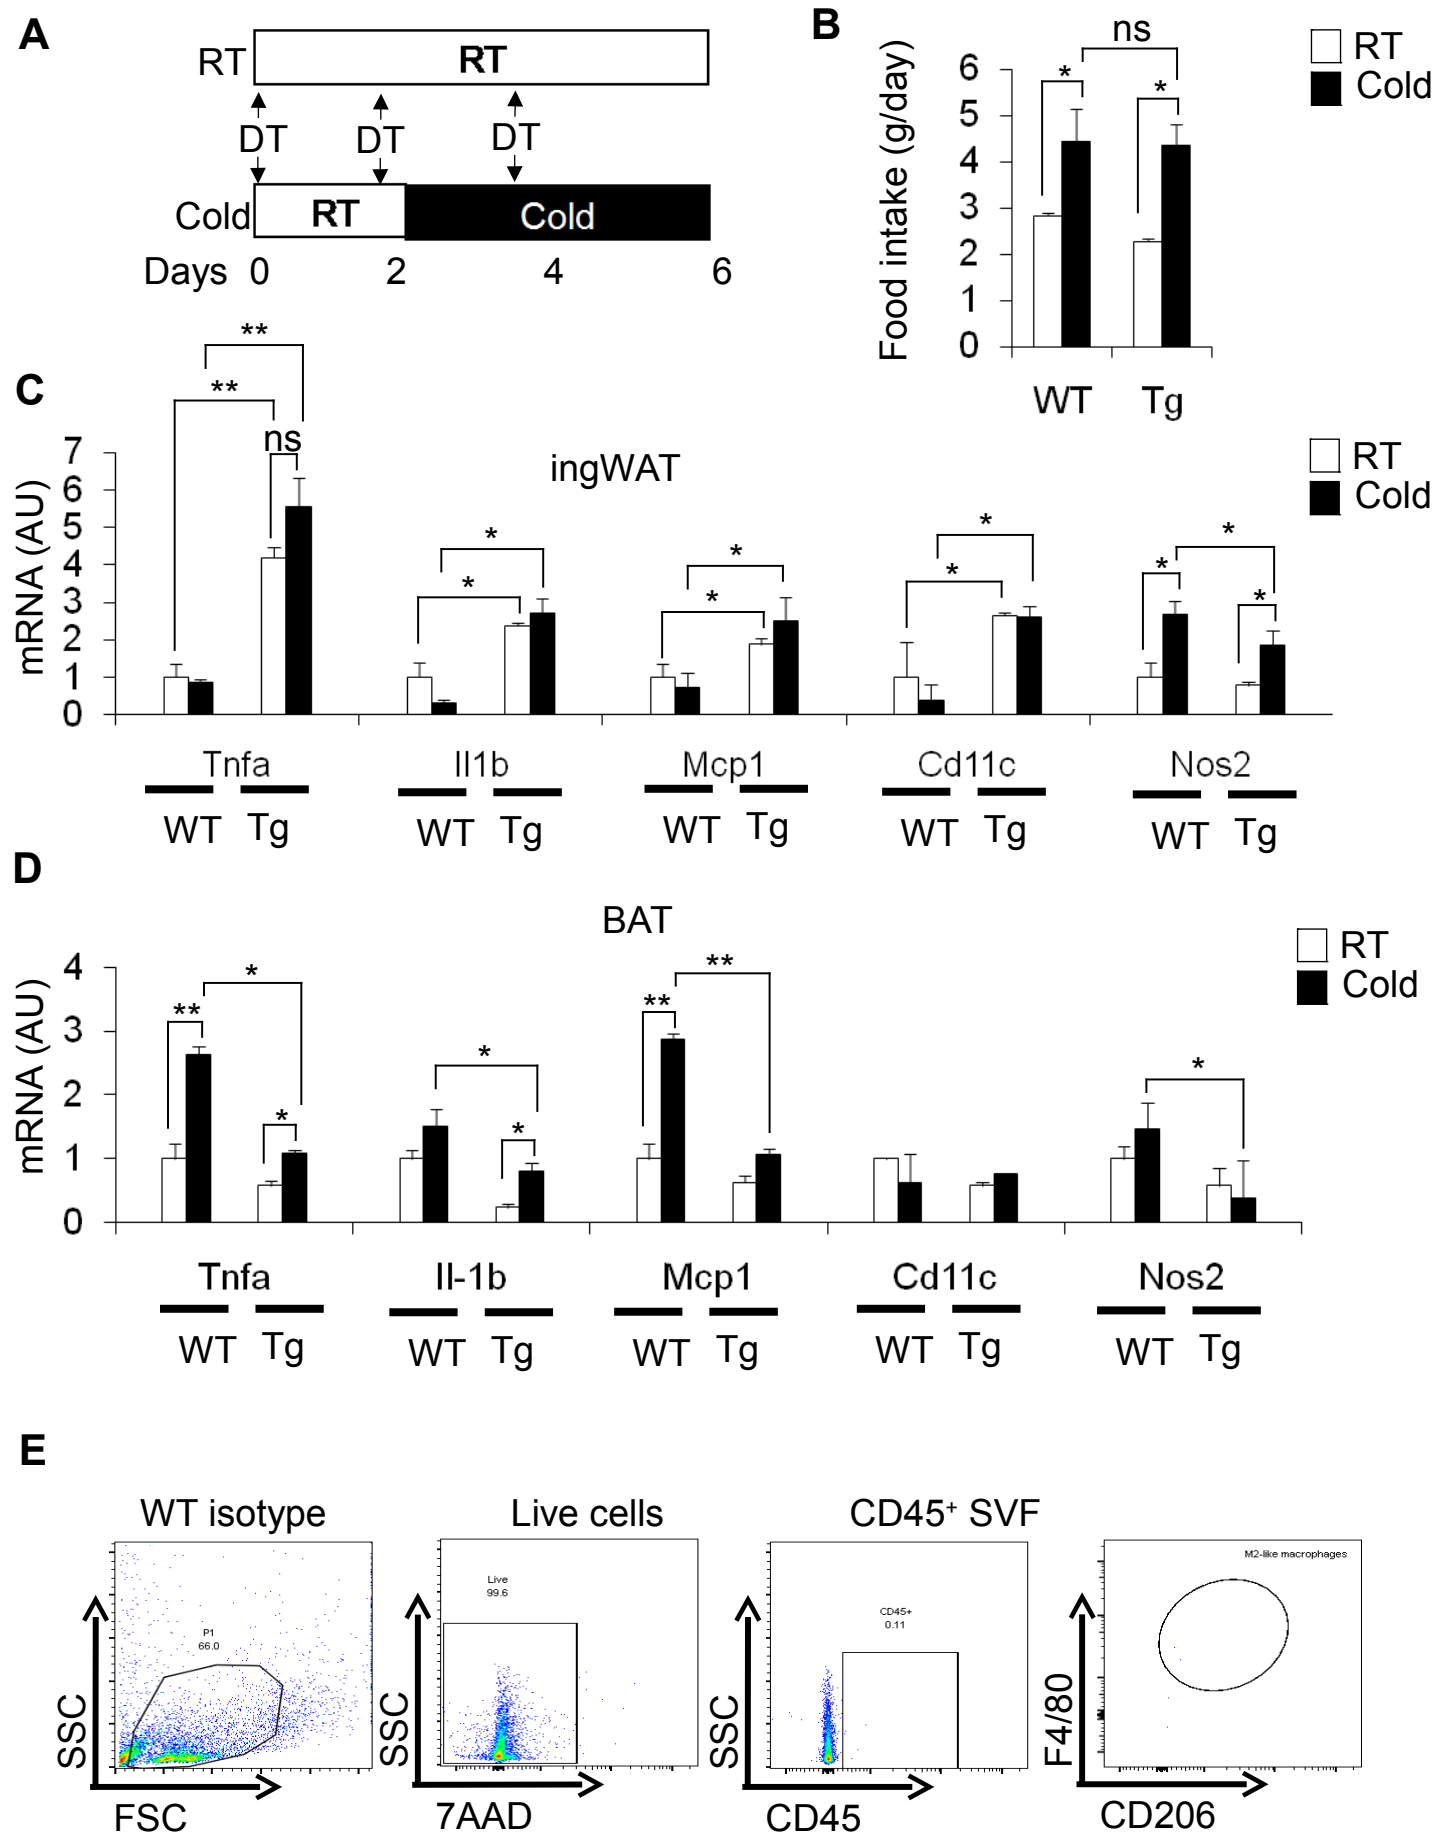



**Figure S4. Schematic diagram for DT administration and full gating strategy for flow cytometric analysis of M2-like macrophages**

**(A).** Schematic representation of the experimental time schedule for cold stimulation and DT-treatment in WT and Tg mice. **(B).** Changes in food intake between the WT and Tg mice maintained at RT and Cold. The data are shown as the means  $\pm$  SEM. \* $p < 0.05$ , \*\* $p < 0.01$  compared with littermates by Student's t-test. **(C,D).** mRNA expression of M1-like macrophages marker genes in the ingWAT and BAT of cold-stimulated, DT-treated WT and Tg mice compared with their littermate controls at RT (n = 4-6 mice per group). **(E).** Full gating strategy for M2-like macrophages. After removing debris, live ingWAT SVF cells were gated for CD45<sup>+</sup> (hematopoietic), and then CD45<sup>+</sup> cells are gated for F4/80<sup>+</sup>CD206<sup>+</sup> double positive population characterized as M2-like macrophages. An isotype was used as a negative control. The experiments were performed using a FACSDiva Version 6.1.2 automated cell analyzer (BD FACSCanto II).

**Figure S5. Flow cytometry analysis of BAT**

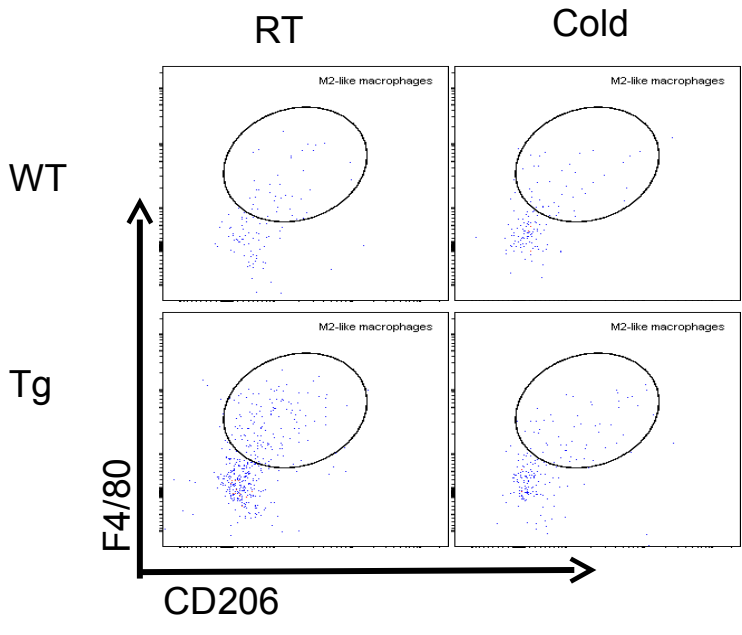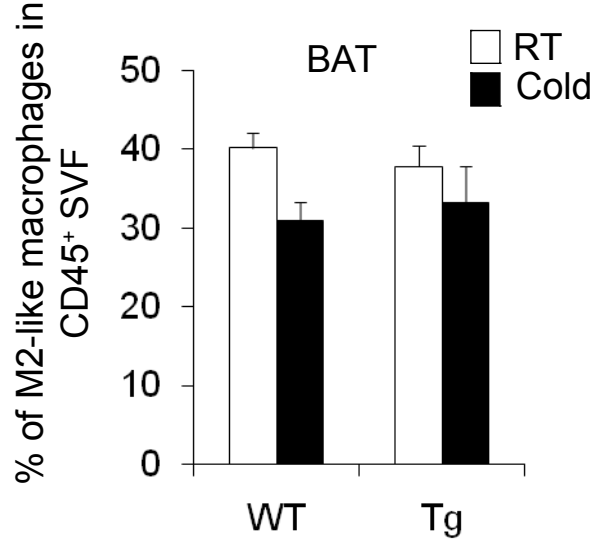

### **Figure S5. Flow cytometry analysis of BAT**

Representative flow cytometric images of BAT from WT and Tg mice (RT vs Cold) (left panel) showing M2-like macrophages. Quantification of M2-like macrophages in CD45<sup>+</sup> SVF is given in right panel. After removing debris, live cells were gated for CD45<sup>+</sup> (hematopoietic), and then CD45<sup>+</sup> cells are gated for F4/80<sup>+</sup>CD206<sup>+</sup> double positive population characterized as M2-like macrophages. An isotype was used as a negative control (n = 3-4 mice per group). The experiments were performed using a FACSDiva Version 6.1.2 automated cell analyzer (BD FACSCanto II). The data are shown as the means  $\pm$  SEM. \* $p < 0.05$ , \*\* $p < 0.01$ , compared with littermates, as determined using Student's t-test.

## Figure S6. Representative morphological analysis of ingWAT

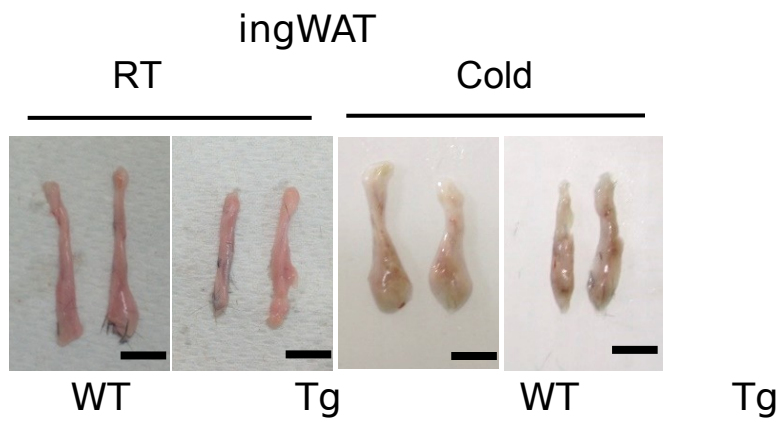

## Figure S6. Representative morphological analysis of ingWAT

Representative morphological analysis of ingWAT of DT-treated WT and Tg mice (Scale bar, 0.5 cm).

## Figure S7. Flow cytometry analysis of ingWAT

Isotype control

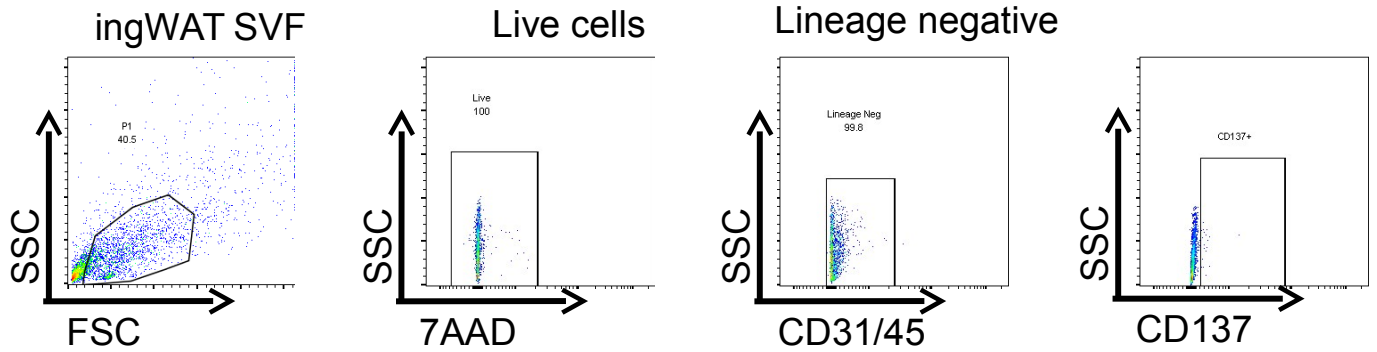

## Figure S7. Flow cytometry analysis of ingWAT

Full gating strategy for CD137<sup>+</sup> beige progenitors. After removing debris, live ingWAT SVF cells were gated for CD31/CD45<sup>-</sup> (endothelial/hematopoietic or lineage negative) population, and then lineage negative population is selected for CD137<sup>+</sup> beige progenitors. An isotype was used as a negative control. The experiments were performed using a FACSDiva Version 6.1.2 automated cell analyzer (BD FACSCanto II).
